# Supplementary material for: Exploring the Research Interest, Capacity and Culture of NHS Staff in South-East Scotland following the SARS-CoV-2 Pandemic: a Qualitative Study
Source: Research Square preprint supplement (doi:10.21203/rs.3.rs-3909362/v1), 2024-02-02
Supplement: Supplementary file 1 [file 0f7f333ff71a1ea94029c477.docx]

**Additional File 1: INTERVIEW GUIDE**

**INDIVIDUAL LEVEL**

- **From your experience, what type of research interest and motivation to be research engaged is there amongst NHS Fife staff?**
- Can you tell me about your view and/or experience of research?
- Can you tell me about your interest in research?
- Is research important for your role within NHS Fife?
- What are your views on volunteering in research studies?
- Has the Covid-19 pandemic changed your perception of research?

**TEAM LEVEL**

- **From your experience, in what ways are NHS Fife staff able to conduct research within their role?**
- How is staff development encouraged?
- Facilitators for research/ Barriers to research
- In what ways can NHS Fife support their staff to engage in research?
- Time/capacity, resources, infrastructure/ Awareness of forums/ conferences? Are these easily accessed?
- Are there any rewards/ incentives for conducting research?
- How easy is it to collaborate with other staff members?
- Is research shared/ part of team working in any way? In what ways?
- Are there any team members who are more focused on research? Is there a reason for this?

**ORGANISATIONAL LEVEL**

- **From your experience, how is research and evidence-based practice promoted and conducted within NHS Fife?**
- Can you describe the process of getting approval for studies? Is it easy to obtain approval?
- Do you feel research is a priority within NHS Fife?
- In what ways does research benefit NHS Fife?
- How important do you think research is to NHS Fife in meeting its priorities?
- Are you aware of any research being currently conducted in NHS Fife?
- Success of funding, skill development programmes?
- Awareness of forums/ conferences? Are these easily accessed?
- How effective are digital platforms such as Blink in promoting research?
- Are there any other digital platforms that promote research culture and practice? How are they effective?
- Who conducts research/ promotes innovation and evidence-based practice in NHS Fife?
- Are there any specialities that focus or that you think need to focus more on research?
- How easy is it connecting with research partners?
