# Supplementary material for: Exploring the Research Interest, Capacity and Culture of NHS Staff in South-East Scotland following the SARS-CoV-2 Pandemic: a Qualitative Study
Source: Research Square preprint supplement (doi:10.21203/rs.3.rs-3909362/v1), 2024-02-02
Supplement: Supplementary file 3 [file 9a206a210a63cbd1ce7801e1.docx]

**Additional File 3. Consent Script**

**Please indicate with a yes/no whether:**

1. Do you voluntarily agree to participate in this research study?
2. You have had the purpose and nature of the study explained to you verbally or in writing and have had the opportunity to ask questions about the study.
3. Do you agree that participation involves taking part in a 30-minute video-call interview and the potential to be contacted for follow-up questions?
4. You have been made fully aware of the potential risks associated with this research and are satisfied with the information provided.
5. Do you agree for your interview to be audio-recorded?
6. Do you understand that even if you agree to participate now, you can withdraw at any time or refuse to answer any question without any consequences of any kind?
7. Do you understand that you can withdraw permission to use data from your interview in which case the material will be deleted?
8. Do you understand that your data once processed will be de-identified and only the researcher and supervisor will have access to the raw data which will be kept securely and confidentially?
9. Do you agree that your data (in line with conditions outlined in the information sheet) will be kept by the researcher, archived, and used for further research projects / by other bona fide researchers?
10. Do you understand that you can contact any of the people involved in the research to seek further clarification and information?
