# Supplementary material for: Exploring the Research Interest, Capacity and Culture of NHS Staff in South-East Scotland following the SARS-CoV-2 Pandemic: a Qualitative Study
Source: Research Square preprint supplement (doi:10.21203/rs.3.rs-3909362/v1), 2024-02-02
Supplement: Supplementary file 4 [file d13cba287ebcdfcad94d7119.docx]

**Additional File 2: PARTICIPANT INFORMATION SHEET**

**WHAT IS THE STUDY ABOUT?**

The Covid-19 pandemic has highlighted the importance of clinical research in the NHS in general but also in identifying treatments for Covid-19 and in saving lives. In March 2021 the UK administrations launched their ‘Vision for Research’ emphasising the need to learn lessons from the pandemic and work towards developing a stronger research culture within the NHS.

The NHS Fife Research and Development (R&D) Department manages research in NHS Fife. Using an online survey, we are assessing research interest, culture, and capacity amongst NHS Fife staff and the Health and Social Care Partnership. We are using semi-structured interviews to gain further insight, giving staff an opportunity to express and elaborate on their thoughts, attitudes, and experiences of research. The online survey and semi-structured interviews will enable us to gain a more comprehensive understanding that will assist in developing a stronger research culture and research opportunities in NHS Fife.

The semi-structured interviews are being conducted by researchers within the R&D Department. The research project is under the supervision of Professor Frances Quirk, Assistant Research, Development, and Innovation Director in NHS Fife. The research protocol for this study has been given Local Management Approval by NHS Fife R&D.

**WHAT WILL I BE ASKED TO DO?**

If you agree to take part in this interview, the duration will be approximately 30 minutes. The interview will be conducted via ‘phone or video call using the Microsoft Teams platform. The interview will be recorded using a digital voice recorder and transcribed for analysis. There is also a possibility that the researchers may get in touch after the interview for a few more follow-up questions. This will also be on a voluntary basis.

The semi-structured interviews will go deeper into the topics covered in the online survey, allowing you to have a chance to express your own experience of research interest, culture, and capacity in NHS Fife. However, you will not have to have completed the on-line survey to participate in the semi-structured interview.

We do not anticipate that the questions have the potential to cause any harm or distress. However, should some questions cause concern, please feel free to refrain from answering or discontinue the study.

As a thank you for your time, when completing the interview, all participants will receive a £20 Amazon gift voucher.

**HOW WILL MY DATA BE STORED AND USED?**

Material gathered during this research will be either anonymous or confidential. It will not be possible for any data to be traced back to you. Data from the interview will be recorded using a digital voice recorder and transcribed for analysis. All data will be securely stored on the NHS Fife server and on an encrypted, password protected file on the researchers’ laptops and within a password protected folder on the Research, Development, and Innovation Department drive.

The results will be finalised and written up in a report that will be made available upon request. The study may also be presented at academic conferences and published in academic journals. Any reports will only include results and no specific information about participants.
